# Supplementary material for: The Phytocomplex from Fucus vesiculosus and Ascophyllum nodosum Controls Postprandial Plasma Glucose Levels: An In Vitro and In Vivo Study in a Mouse Model of NASH
Source: PubMed Central journal article supplement (PMC5334621; doi:10.3390/md15020041), 2017-02-15
Supplement: marinedrugs-15-00041-s001.pdf [file marinedrugs-15-00041-s001.pdf]

# Supplementary Materials: Phytoextract from *Fucus vesiculosus* and *Ascophyllum nodosum* Controls Postprandial Plasma Glucose Levels: An In Vitro and In Vivo Study in a Mouse Model of NASH

Daniela Gabbia, Stefano Dall'Acqua, Iole-Maria Di Gangi, Sara Bogialli, Valentina Caputi, Laura Albertoni, Iaria Marsilio, Nicola Paccagnella, Maria Carrara, Maria Cecilia Giron and Sara De Martin

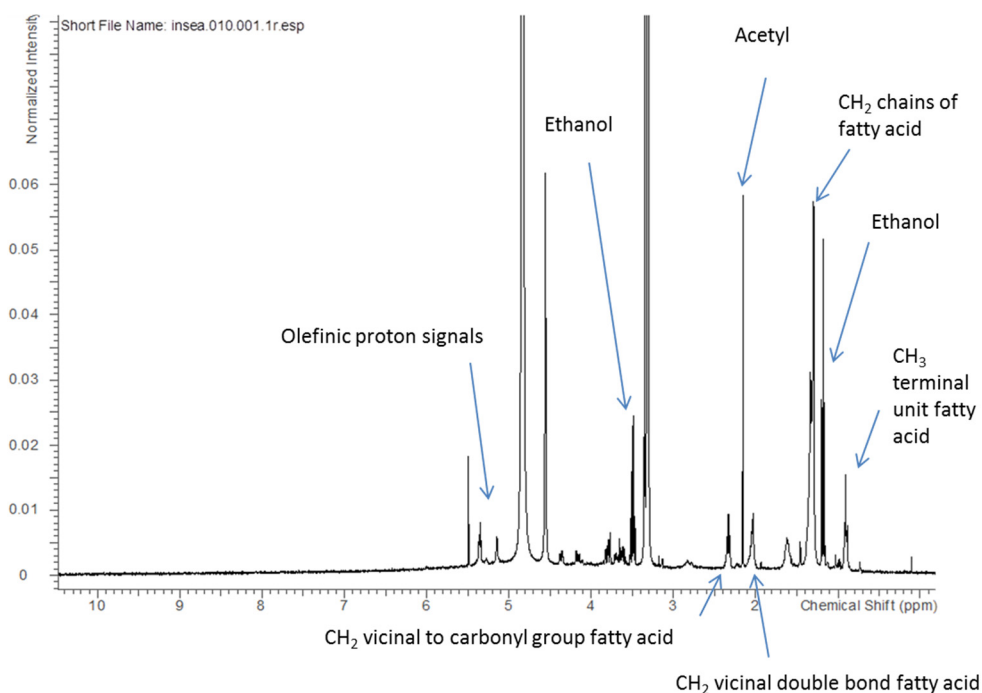

**Figure S1.** <sup>1</sup>H-NMR spectrum of the algal extract in deuterated methanol.

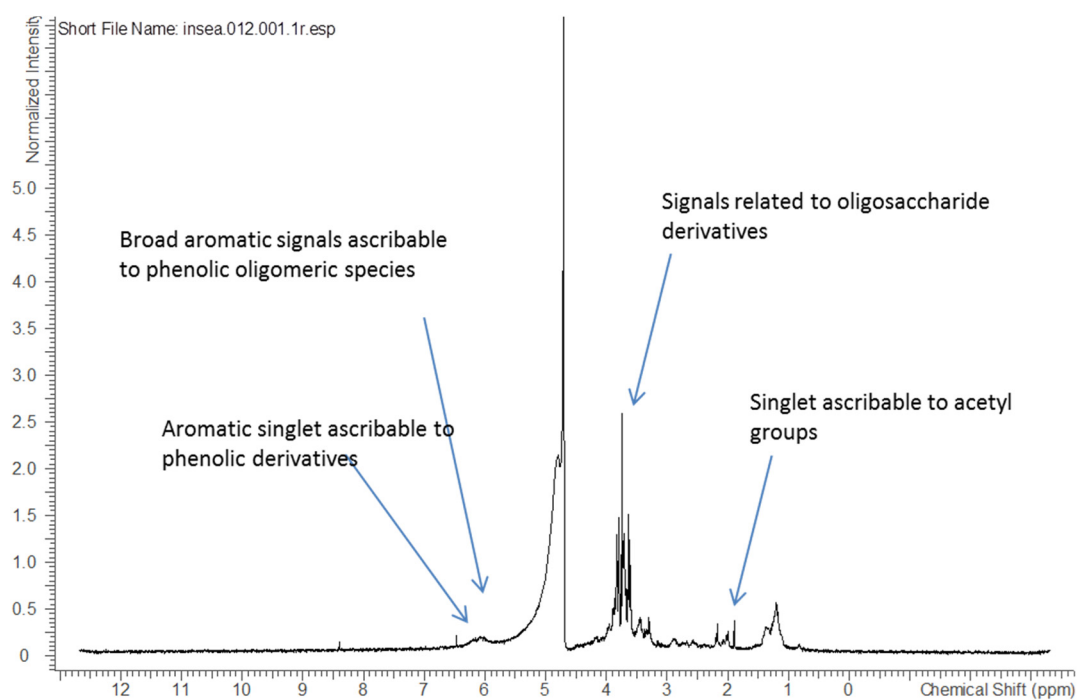

**Figure S2.** <sup>1</sup>H-NMR spectrum of the algal extract in deuterated water.

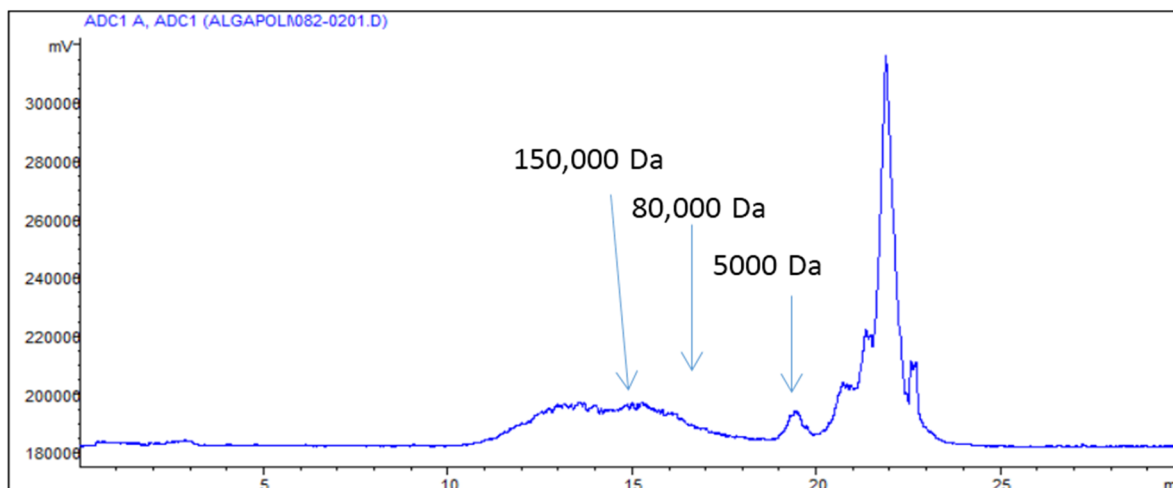

Figure S3. HPLC with gel permeation.

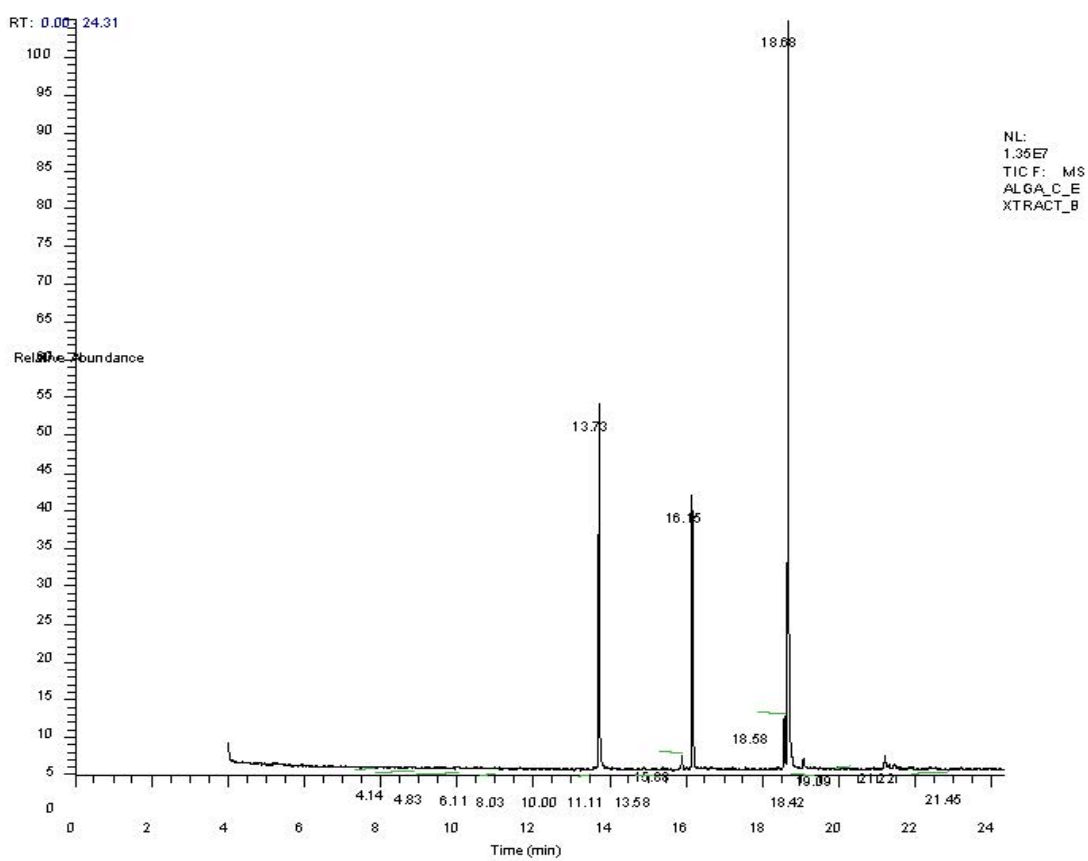

Figure S4. GC-MS chromatogram to identification of methylated fatty acids.
